# Supplementary material
Source: bioRxiv or medRxiv preprint supplement (https://medrxiv.org/highwire/filestream/77525/field_highwire_adjunct_files/2/2020.04.19.20071563-3.pdf)
Supplement: Supplementary file [file 2020.04.19.20071563-3.pdf]

|                                                               |                                                                                        | Antibody N             | Antibody P/B           |
|---------------------------------------------------------------|----------------------------------------------------------------------------------------|------------------------|------------------------|
| <b>Sex, n (%)</b>                                             | Males                                                                                  | 133 (22.09)            | 22 (17.60)             |
|                                                               | Females                                                                                | 469 (77.91)            | 103 (82.40)            |
| <b>Age median (IQR)</b>                                       |                                                                                        | 45.71<br>(34.14-54.13) | 41.95<br>(33.57-50.25) |
| <b>Age groups (y), n (%)</b>                                  | 22-30                                                                                  | 103 (17.11)            | 22 (17.60)             |
|                                                               | 31-40                                                                                  | 126 (20.93)            | 38 (30.40)             |
|                                                               | 41-50                                                                                  | 164 (27.24)            | 35 (28.00)             |
|                                                               | 51-60                                                                                  | 175 (29.07)            | 25 (20.00)             |
|                                                               | 61-77                                                                                  | 34 (5.65)              | 5 (4.00)               |
| <b>Nasal/oral swabs, positive, n (%)</b>                      |                                                                                        | 0 (0)                  | 1 (0.8)                |
| <b>Exposure risk occupations, n (%)</b>                       | High                                                                                   | 270 (44.85)            | 65 (52.00)             |
|                                                               | Medium                                                                                 | 228 (37.87)            | 49 (39.20)             |
|                                                               | Low                                                                                    | 104 (17.28)            | 11 (8.80)              |
| <b>Professional information, n (%)</b>                        | Medical doctor                                                                         | 143 (23.75)            | 47 (37.60)             |
|                                                               | Nurse                                                                                  | 180 (29.90)            | 32 (25.60)             |
|                                                               | Obstetrician                                                                           | 43 (7.14)              | 10 (8.00)              |
|                                                               | Healthcare operator                                                                    | 58 (9.63)              | 11 (8.80)              |
|                                                               | Administration staff                                                                   | 56 (9.30)              | 8 (6.40)               |
|                                                               | Laboratory technician                                                                  | 14 (2.33)              | 2 (1.60)               |
|                                                               | Radiology technician                                                                   | 8 (1.33)               | 1 (0.80)               |
|                                                               | Other                                                                                  | 100 (16.61)            | 14 (11.2)              |
| <b>Professional risk in the last three months, yes, n (%)</b> | Performance of invasive maneuvers (e.g. aerosol / bronchoalveolar lavage / intubation) | 107 (17.77)            | 26 (20.80)             |
|                                                               | Performance of Covid19 swabs on a patient                                              | 53 (8.80)              | 8 (6.40)               |
| <b>Epidemiological risk (out of the workplace), n (%)</b>     | Unknown contacts with positive/suspect Covid-19                                        | 464 (77.59)            | 89 (71.77)             |
|                                                               | Contact with symptomatic/positive Covid-19                                             | 65 (10.87)             | 14 (11.29)             |
|                                                               | Contact with symptomatic/negative Covid-                                               | 19 (3.18)              | 4 (3.23)               |

|                                             |                                                                |              |            |
|---------------------------------------------|----------------------------------------------------------------|--------------|------------|
|                                             | 19                                                             |              |            |
|                                             | Contact with asymptomatic/positive Covid-19                    | 32 (5.35)    | 10 (8.06)  |
|                                             | Contact with symptomatic/suspect without Covid-19 confirmation | 18 (3.01)    | 7 (5.65)   |
| <b>Personal medical history, yes, n (%)</b> | Flu vaccine (2019-2020)                                        | 206 (34.22)  | 47 (37.60) |
|                                             | Chronic conditions                                             | 223 (37.04)  | 39 (31.20) |
|                                             | Chronic drugs                                                  | 208 (34.55)  | 35 (28.00) |
|                                             | Symptoms at 3 months, $\geq 1$                                 | 444 (73.75%) | 98 (78.40) |
|                                             | Symptoms at 3 days, $\geq 1$                                   | 242 (40.20)  | 55 (44.00) |

**Supplementary Table 3:** Description of samples characteristics with regard to the antibody test. In the antibody columns: N=negative; P/B= Positive/Borderline. IQR=interquartile range; n (%)= number in percentage
